# Supplementary material for: Silibinin Ameliorates O-GlcNAcylation and Inflammation in a Mouse Model of Nonalcoholic Steatohepatitis
Source: PubMed Central journal article supplement (PMC6121629; doi:10.3390/ijms19082165), 2018-07-24
Supplement: ijms-19-02165-s001.pdf [file ijms-19-02165-s001.pdf]

## Silibinin Ameliorates O-GlcNAcylation and Inflammation in a Mouse Model of Nonalcoholic Steatohepatitis

Su Jin Lee, Min Jung Nam, Da Eun Lee, Jeen-Woo Park, Beom Sik Kang, Dong-Seok Lee, Hyun-Shik Lee and Oh-Shin Kwon \*

School of Life Science, College of Natural Science, Kyungpook National University, Daegu 41566, Korea; neojove79@naver.com (S.J.L.); nmj0604@naver.com (M.J.N.); Starkr0@hanmail.net (D.E.L.); parkjw@knu.ac.kr (J.-W.P.); bskang2@knu.ac.kr (B.S.K.); lee1@knu.ac.kr (D.-S.L.); leeh@knu.ac.kr (H.-S.L.)

\* Correspondence: oskwon@knu.ac.kr; Tel.: +82-53-950-6356; Fax: +82-53-943-2762

Received: 1 June 2018; Accepted: 19 July 2018; Published: 24 July 2018

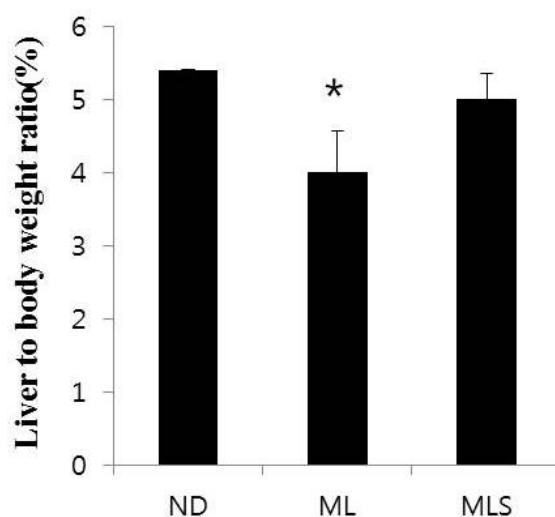

**Figure S1.** MCD+LPS diet-induced liver steatohepatitis. MCD diet affected body weight and liver weights levels of ND, MCD/LPS diet, or MCD/LPS diet + silibinin for three weeks.

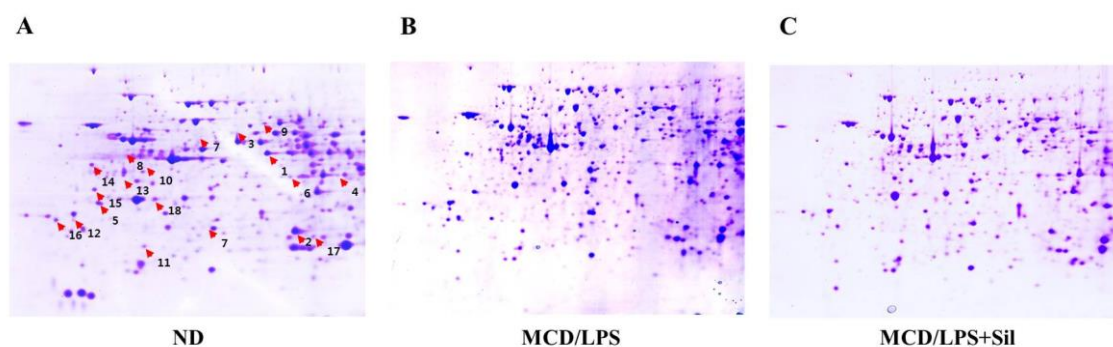

**Figure S2.** Protein expression map of mouse liver. Coomassie Blue-stained 2DE gel shows the proteins derived from mice fed ND, MCD/LPS, or MCD/LPS + silibinin-treated diet. The proteins from the mouse

liver were loaded on a 24 IPG strip (pH 4–7) and subjected to SDS-PAGE (12%). The protein spots significantly affected by different diets are indicated by arrows. The numbers on the gel correspond to the spot numbers in Table 1.

**Table S1.** Primers used for real-time PCR.

| <b>Primer name</b>            | <b>Sequences</b>                                                                         |
|-------------------------------|------------------------------------------------------------------------------------------|
| <i>18S rRNA</i>               | (F)5'-GTA ACC CGT TGA ACC CCA TT-3'<br>(R)5'-CCA TCC AAT CGG TAG TAG CG-3'               |
| <i>TNF<math>\alpha</math></i> | (F)5'-CAC CAC CAT CAA GGA CTC AA-3'<br>(R)5'-AGG CAA CCT GAC CAC TCT CC-3'               |
| <i>Myd88</i>                  | (F)5'-AGA ACA GAC AGA CTA TCG GCT-3'<br>(R)5'-CGG CGA CAC CTT TTC TCA AT-3'              |
| <i>TGF<math>\beta</math>1</i> | (F)5'-ATT CCT GGC GTT ACC TTG-3'<br>(R)5'-CTG TAT TCC GTC TCC TTG GTT-3'                 |
| <i>IL-6</i>                   | (F)5'-GAC AAC TTT GGC ATT GTG G-3'<br>(R)5'-ATG CAG GGA TGA TGT TCT G-3'                 |
| <i>TLR4</i>                   | (F)5'-ACC TCT GCC TTC ACT ACA GA-3'<br>(R)5'-AGG GAC TTC TCA ACC TTC TC-3'               |
| <i>iNOS</i>                   | (F)5'-CTG CAG CAC TTG GAT CAG GAA CCT G-3'<br>(R)5'-GGG AGT AGC CTG TGT GCA CCT GGA A-3' |
| <i>XBP1s</i>                  | (F)5'-AAG AAC ACG CTT GGG AAT GG-3'<br>(R)5'-ACT CCC CTT GGC CTC CAC-3'                  |
| <i>GFAT1</i>                  | (F)5'-TAA GGA GAT CCA GCG GTG TC-3'<br>(R)5'-CAG CTG TCT CGC CTG ATT GA-3'               |
| <i>GLUT4</i>                  | (F)5'-GAT TCT GCT GCC CTT CTG TC-3'<br>(R)5'-ATT GGA CGC TCT CTC TCC AA-3'               |
